# Supplementary material for: Lipase-mediated flow synthesis of nature-inspired phenolic carbonates
Source: Royal Society of Chemistry journal article supplement (doi:10.1039/d3ra04735k), 2023-01-01

## Supporting Information for

### Lipase-mediated flow synthesis of nature-inspired phenolic carbonates

Sara Vicinanza <sup>a†</sup>, Francesca Annunziata <sup>a†</sup>, Desireè Pecora <sup>a</sup>, Andrea Pinto <sup>b</sup> and Lucia Tamborini <sup>a\*</sup>

<sup>a</sup> *Department of pharmaceutical sciences (DISFARM), University of Milan, Via L. Mangiagalli 25, 20133-Milan, Italy.*

<sup>b</sup> *Department of Food, Environmental and Nutritional Sciences (DeFENS), University of Milan, via Celoria 2, 20133 Milan, Italy.*

\*[lucia.tamborini@unimi.it](mailto:lucia.tamborini@unimi.it)

#### Contents

|                                                                            |        |
|----------------------------------------------------------------------------|--------|
| <sup>1</sup> H-NMR and <sup>13</sup> C-NMR spectra of compounds <b>1-4</b> | page 2 |
| HPLC chromatograms of compounds <b>1-4</b>                                 | page 7 |

# NMR Spectra

1

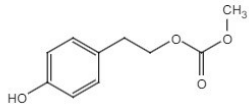

$^1\text{H-NMR}$  (300 MHz,  $\text{CDCl}_3$ )

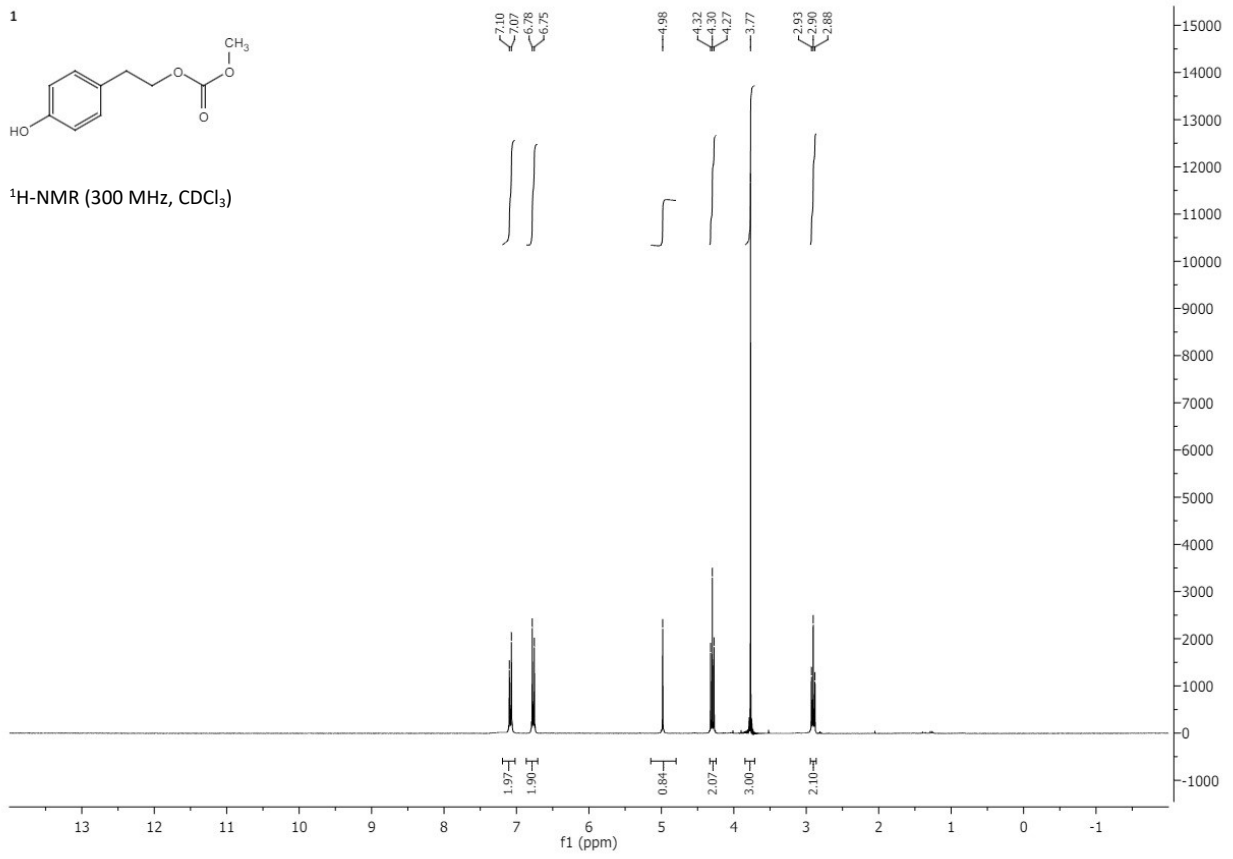

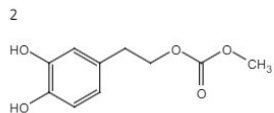

<sup>1</sup>H-NMR (300 MHz, CD<sub>3</sub>OD)

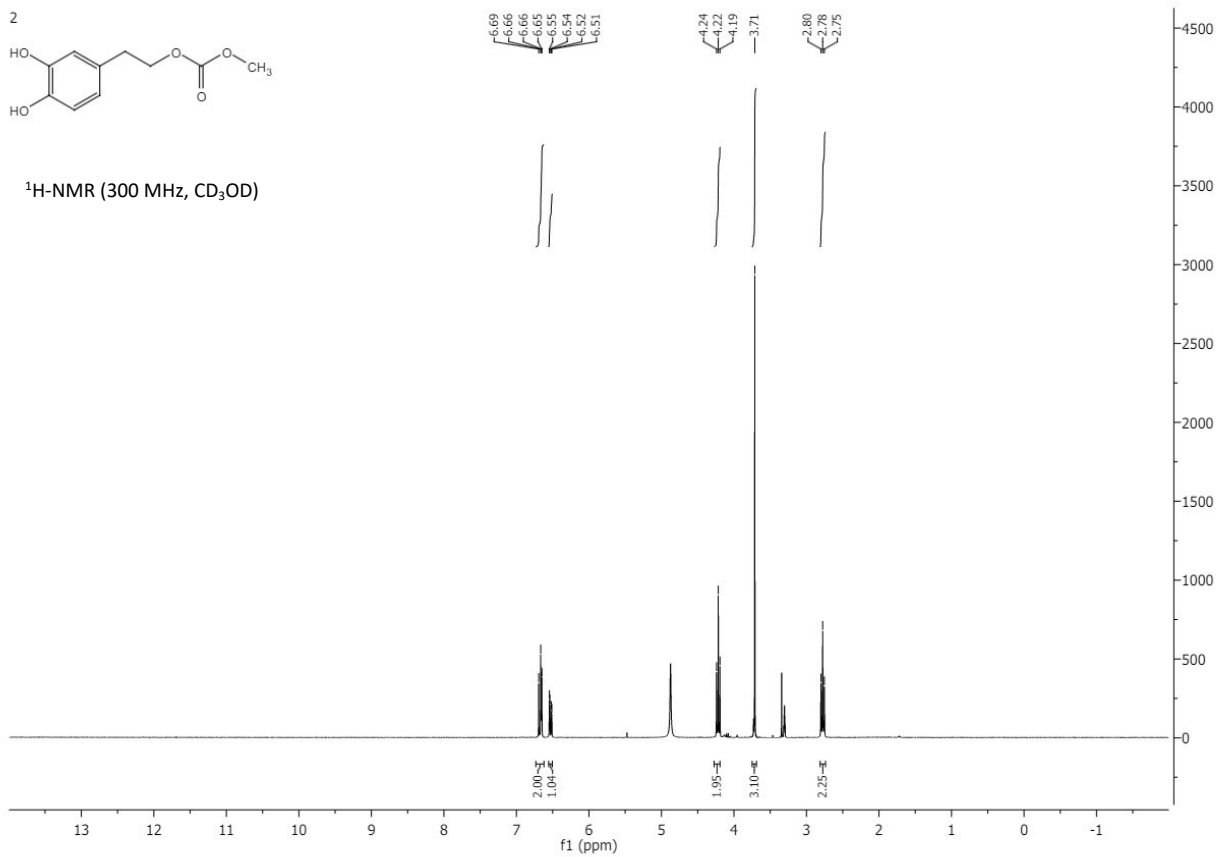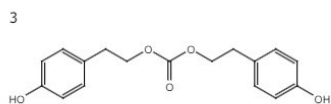

<sup>1</sup>H-NMR (300 MHz, CD<sub>3</sub>OD)

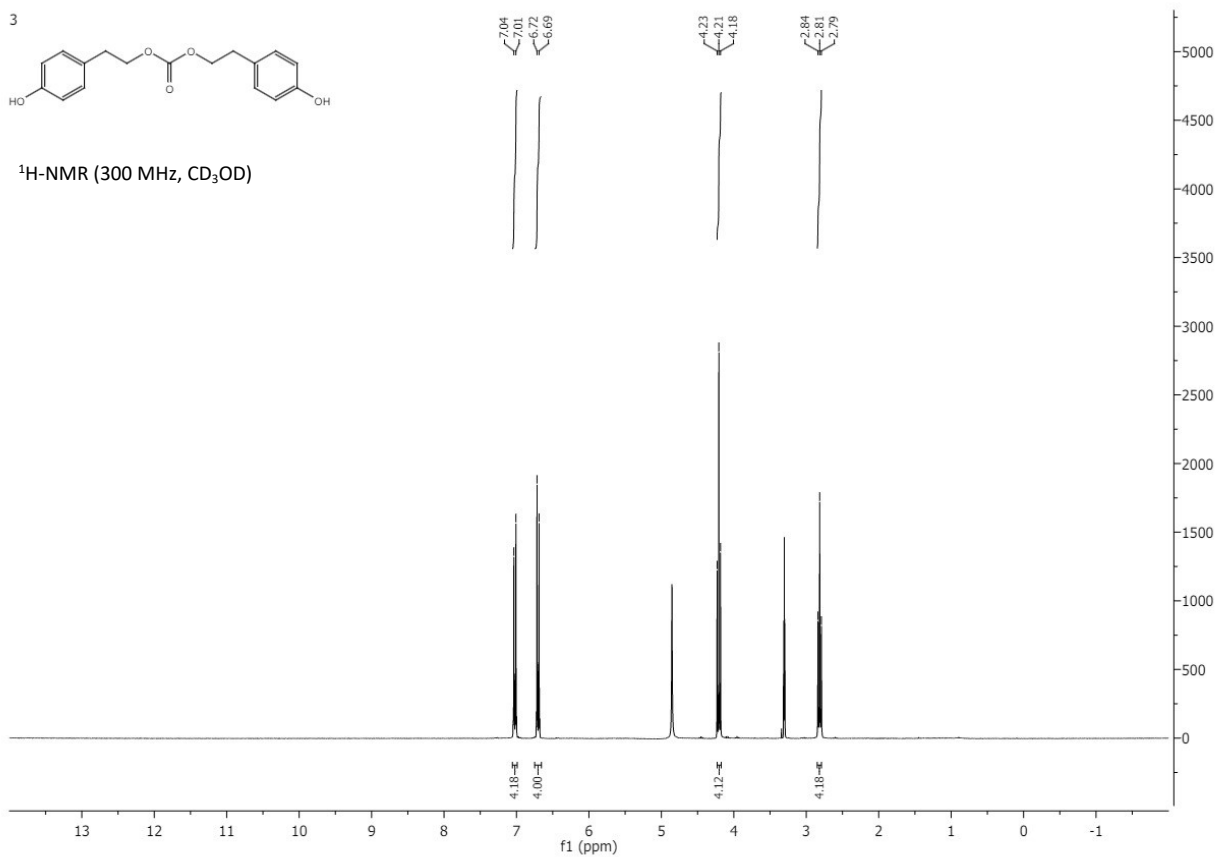

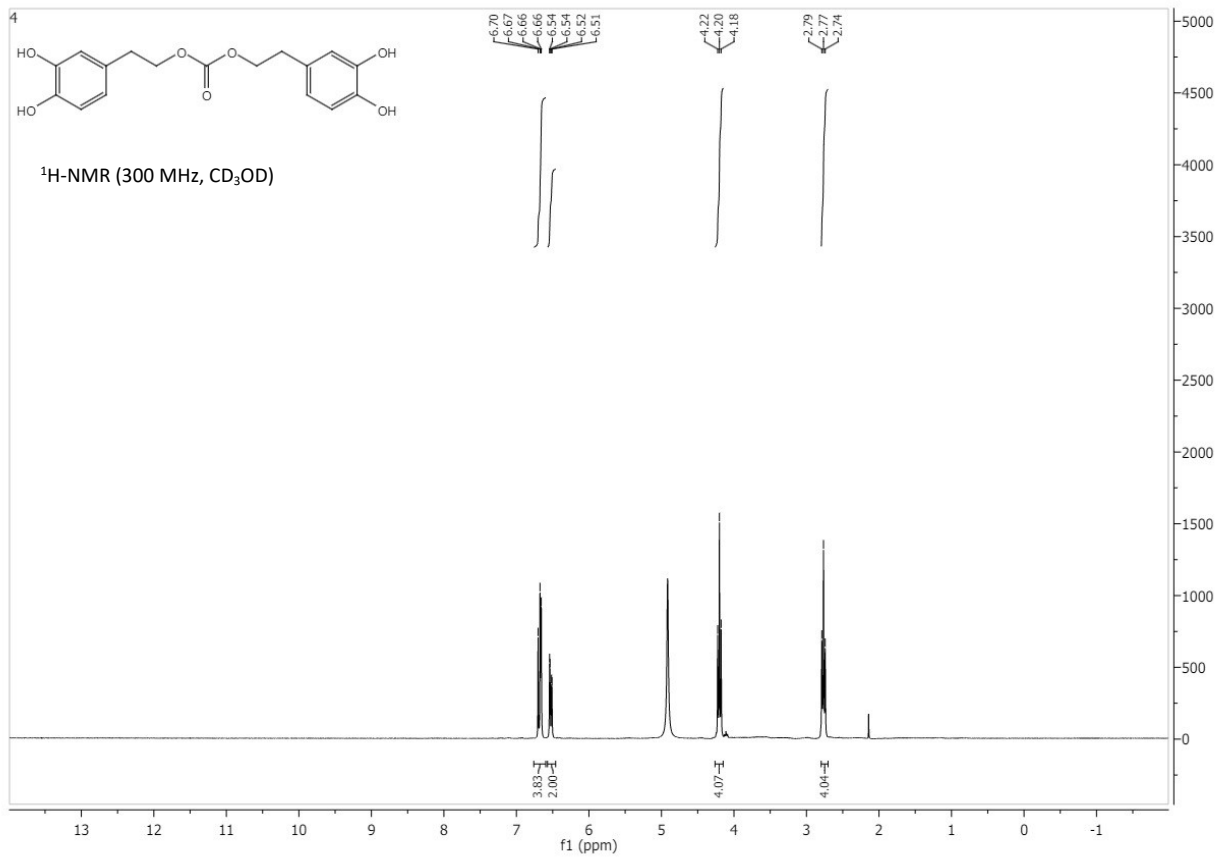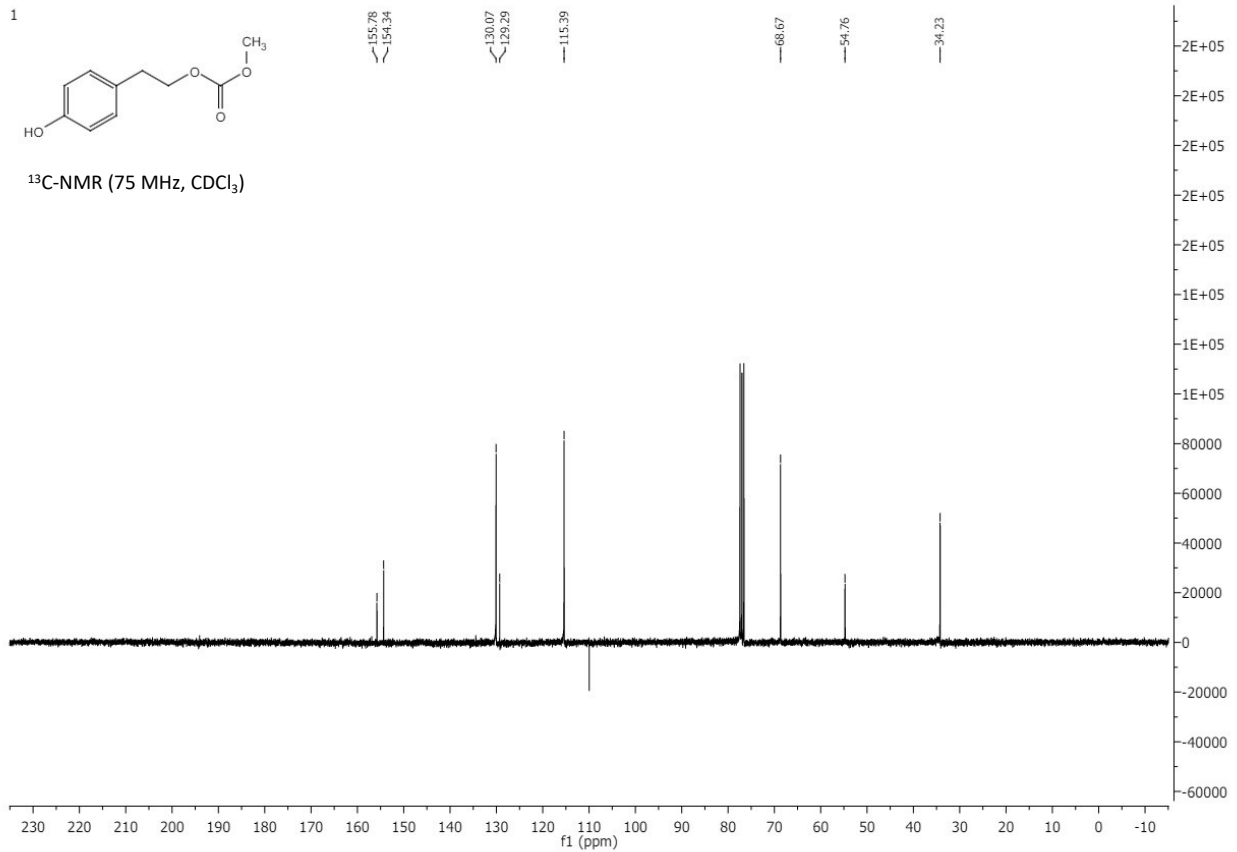

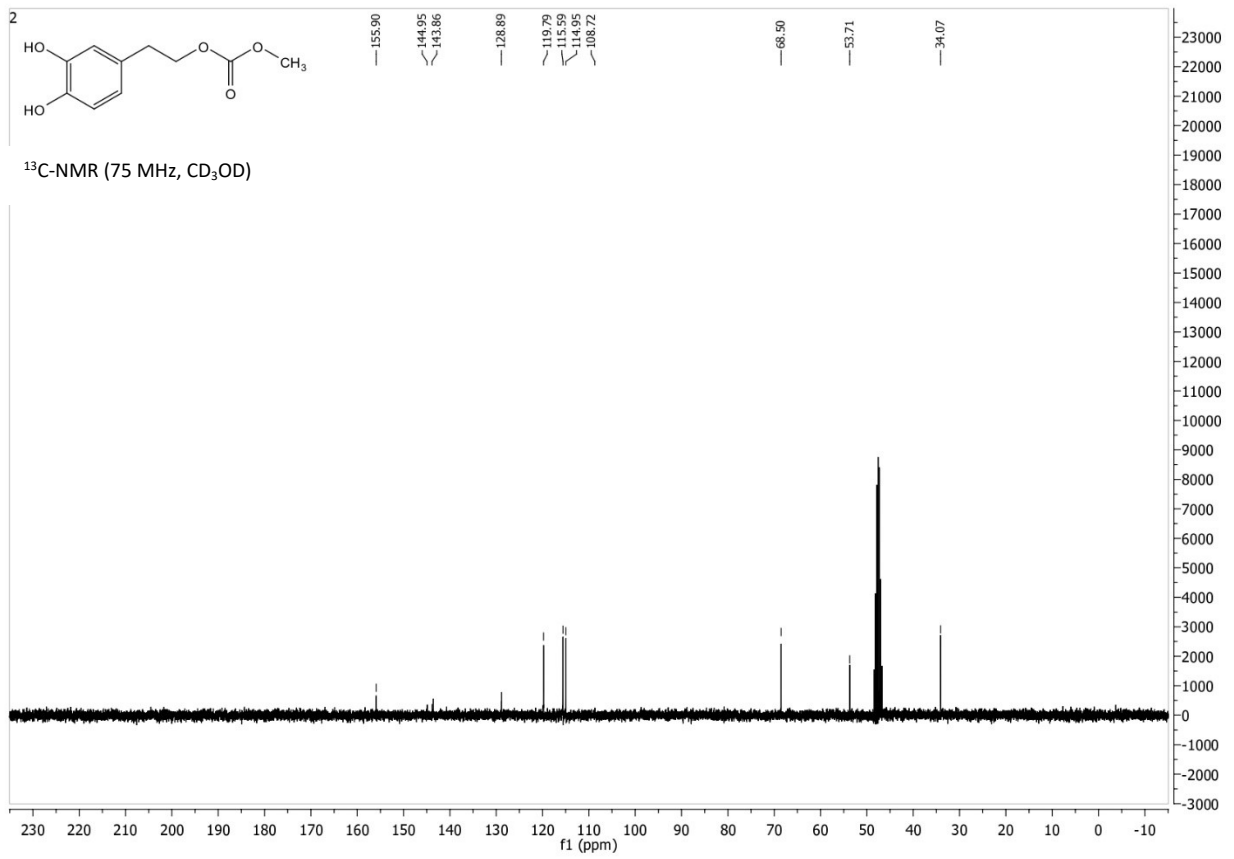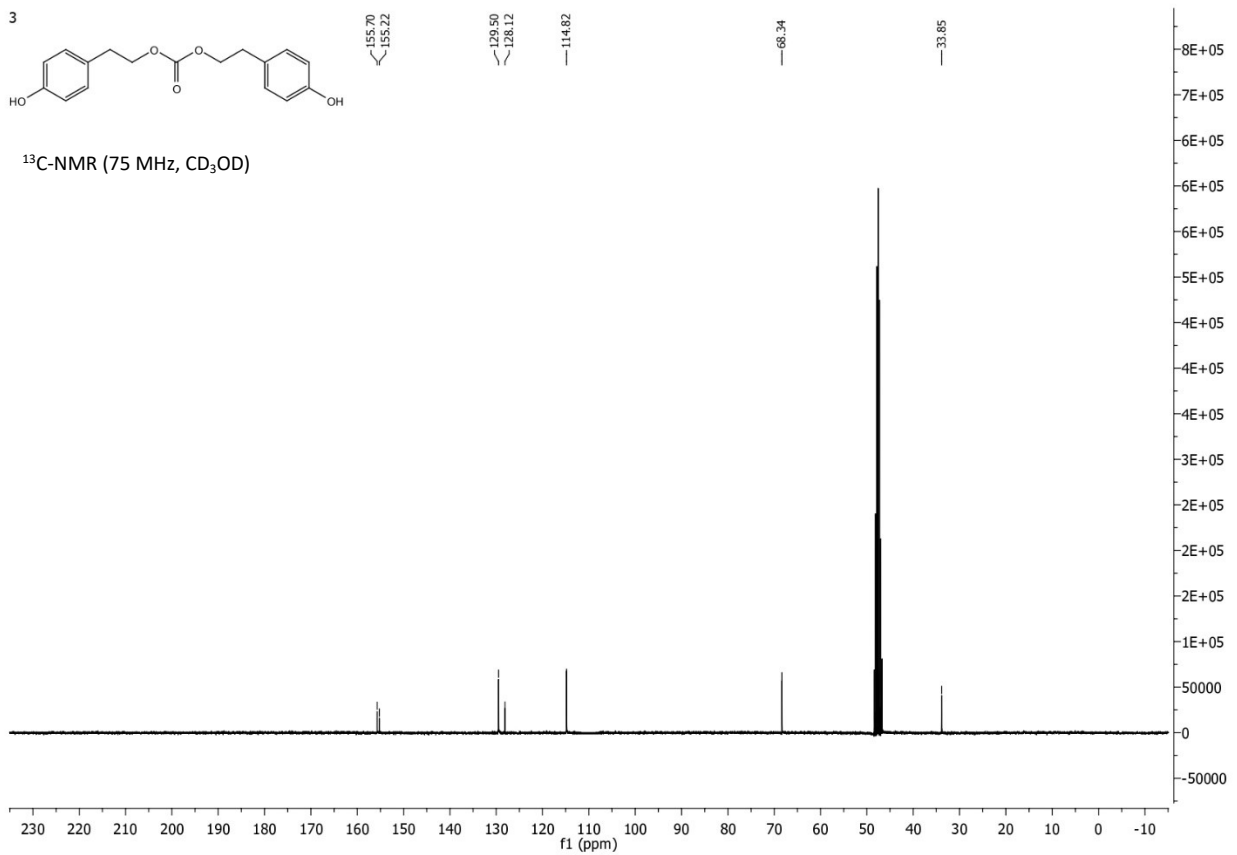

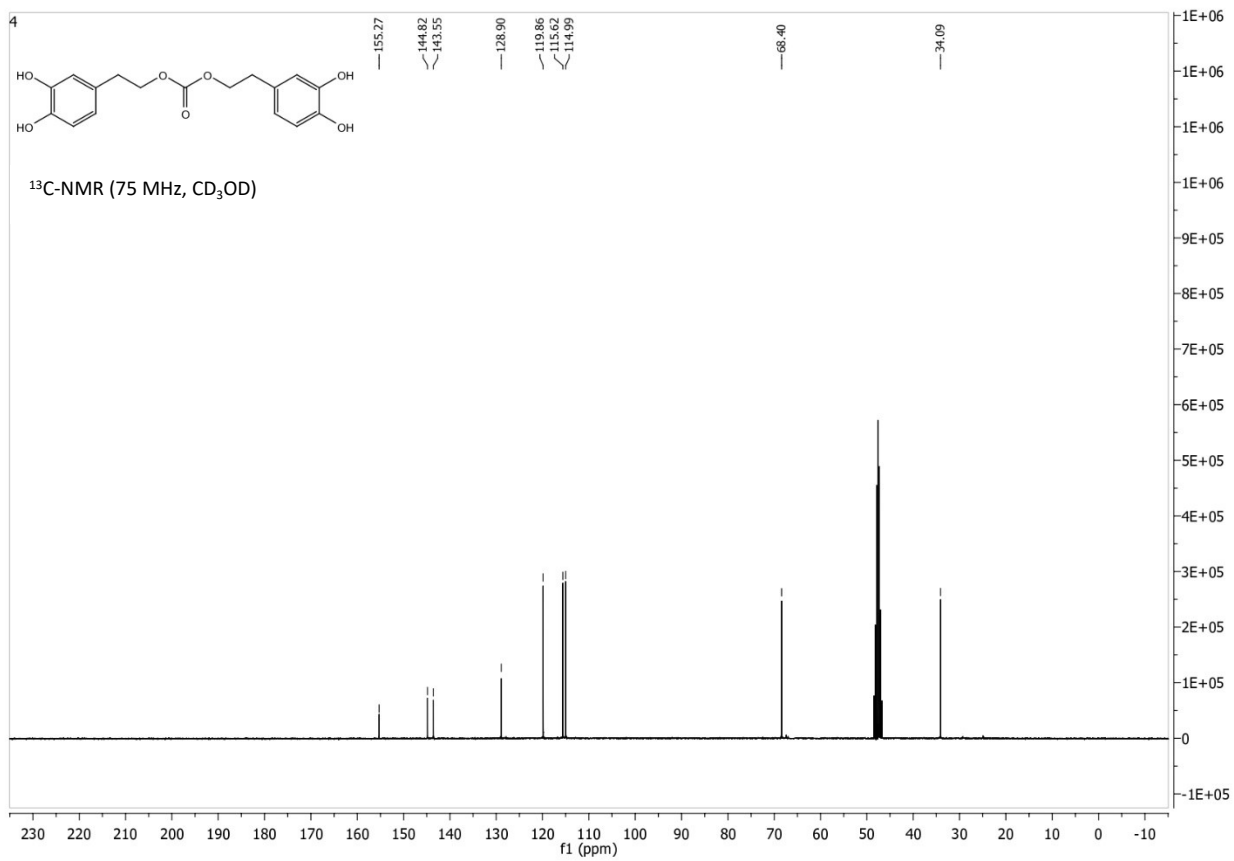

## HPLC Chromatograms

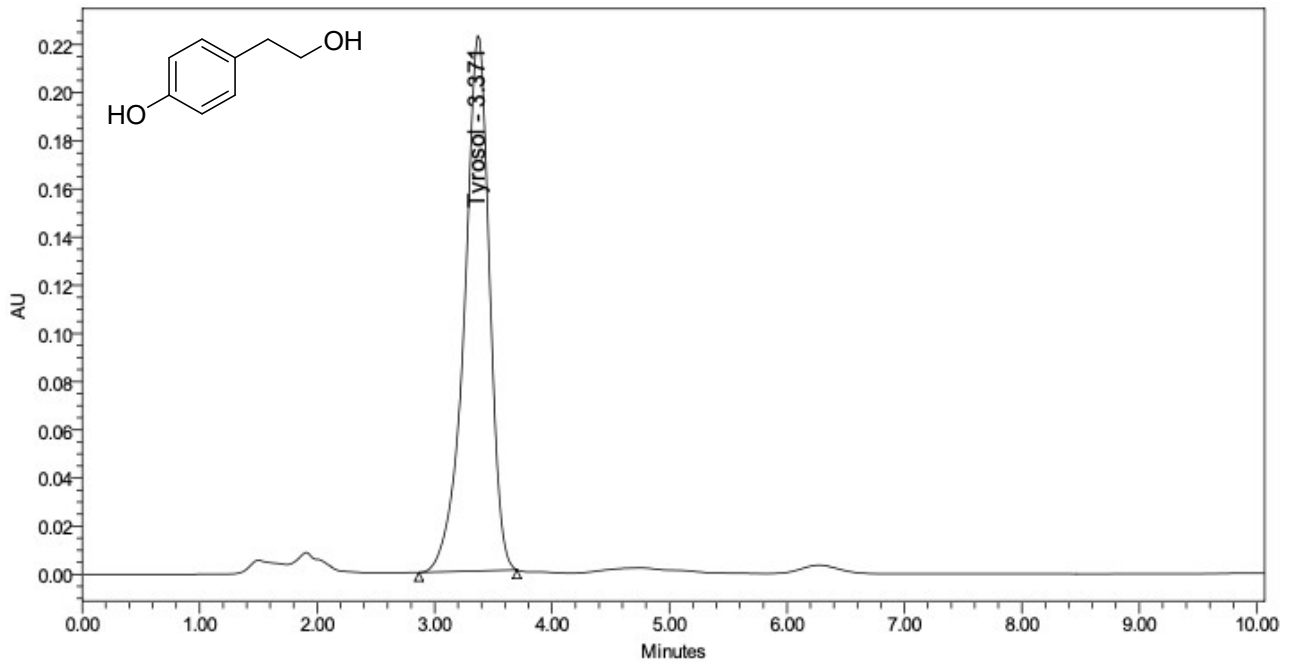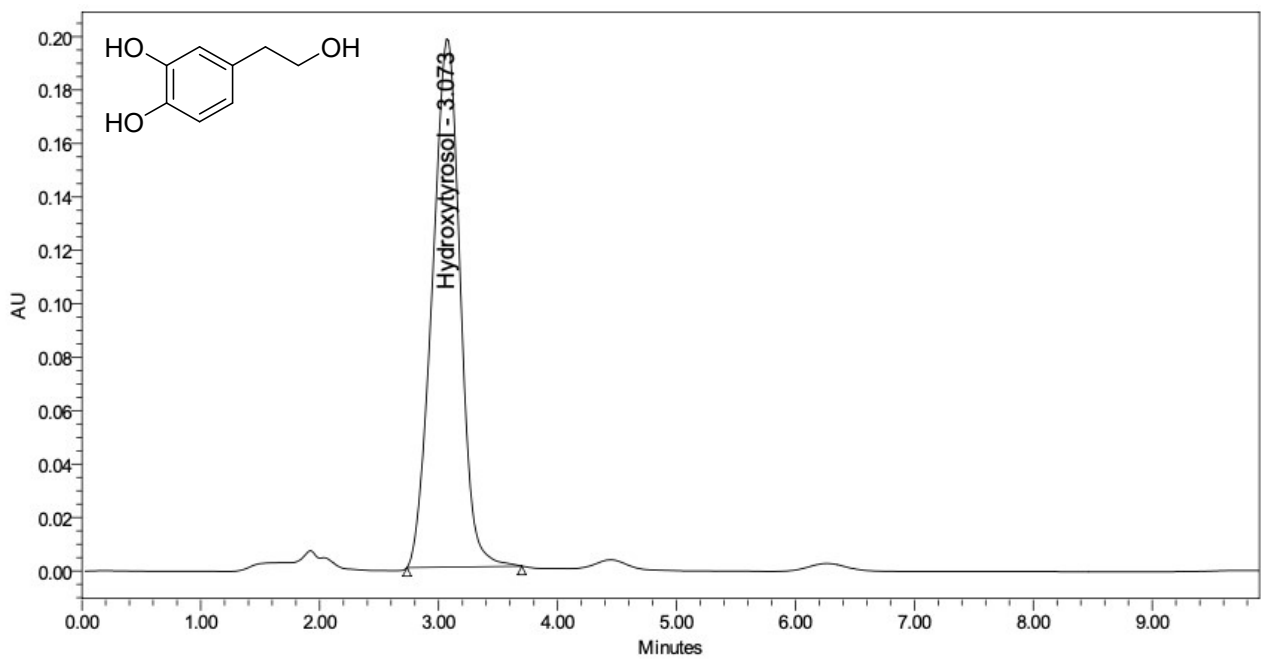

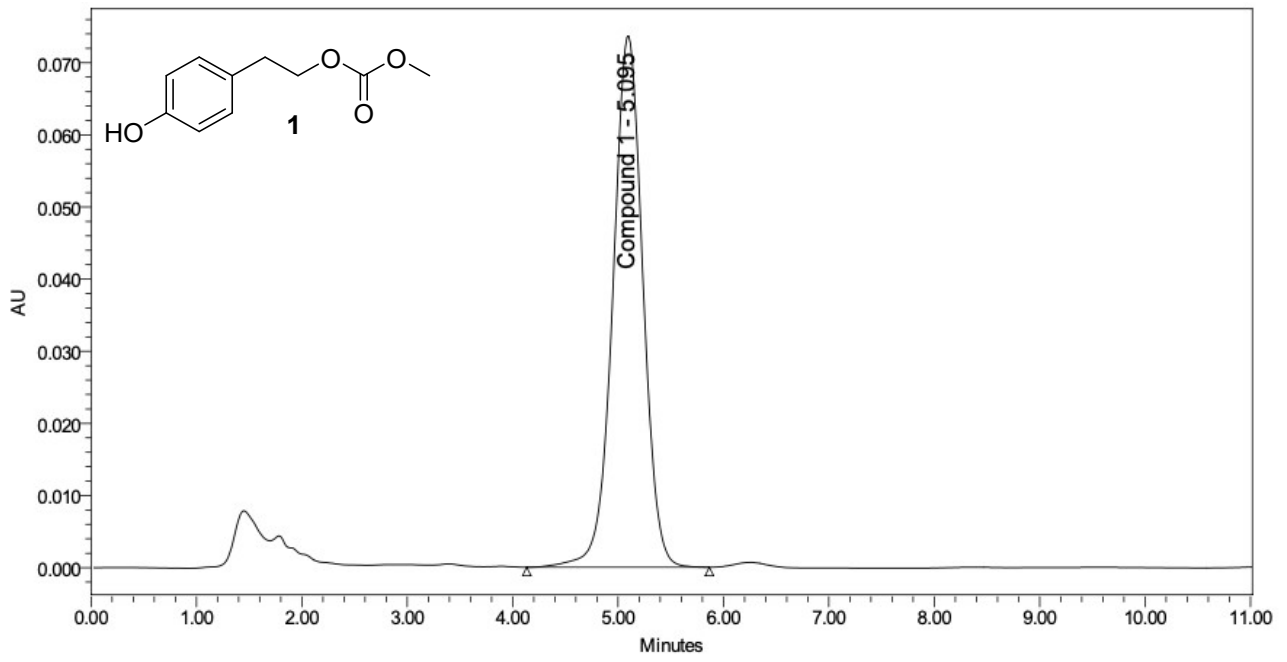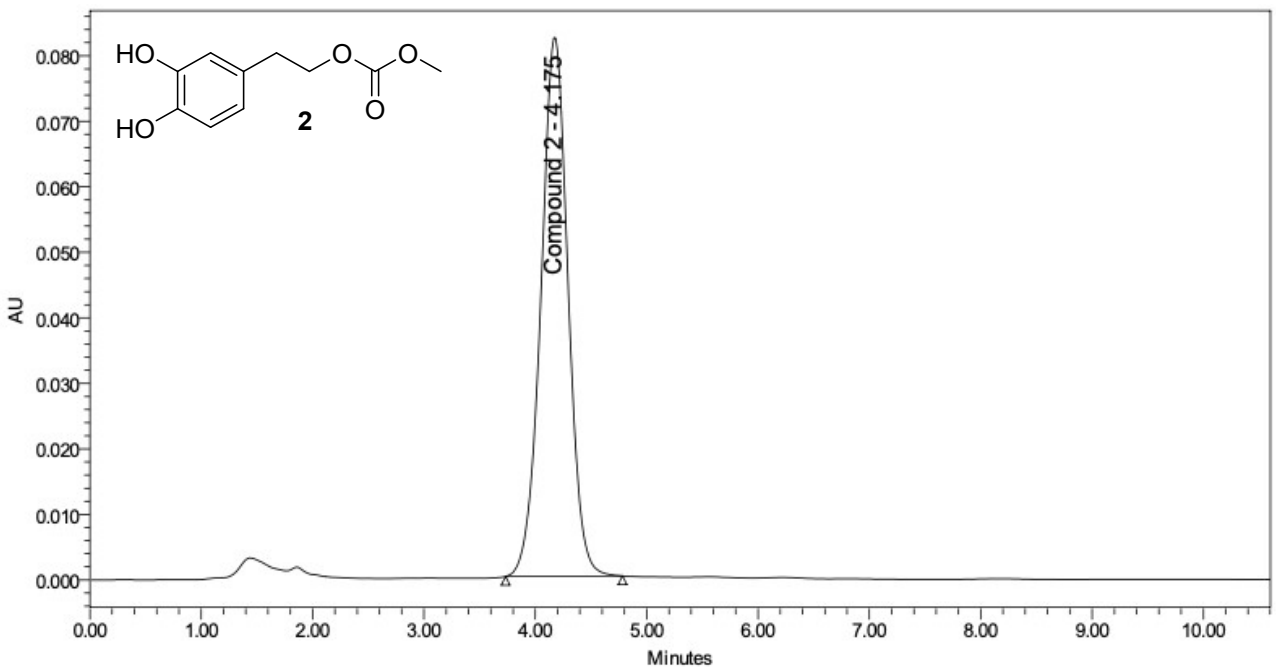



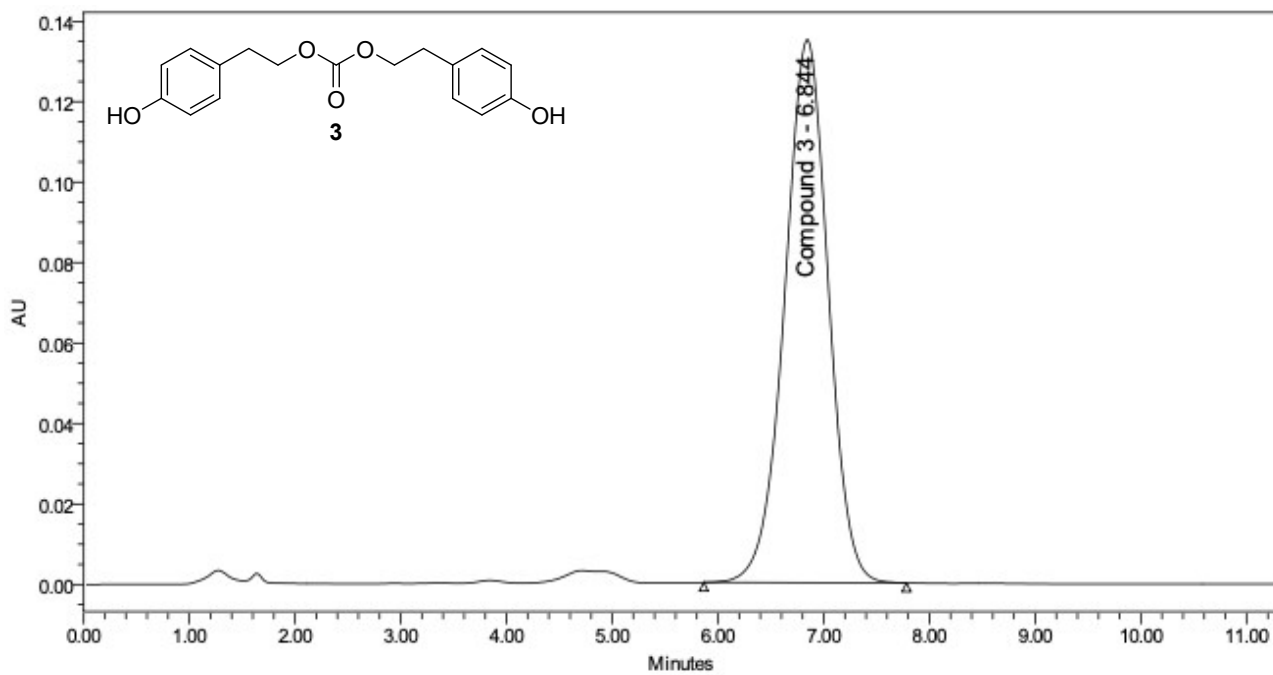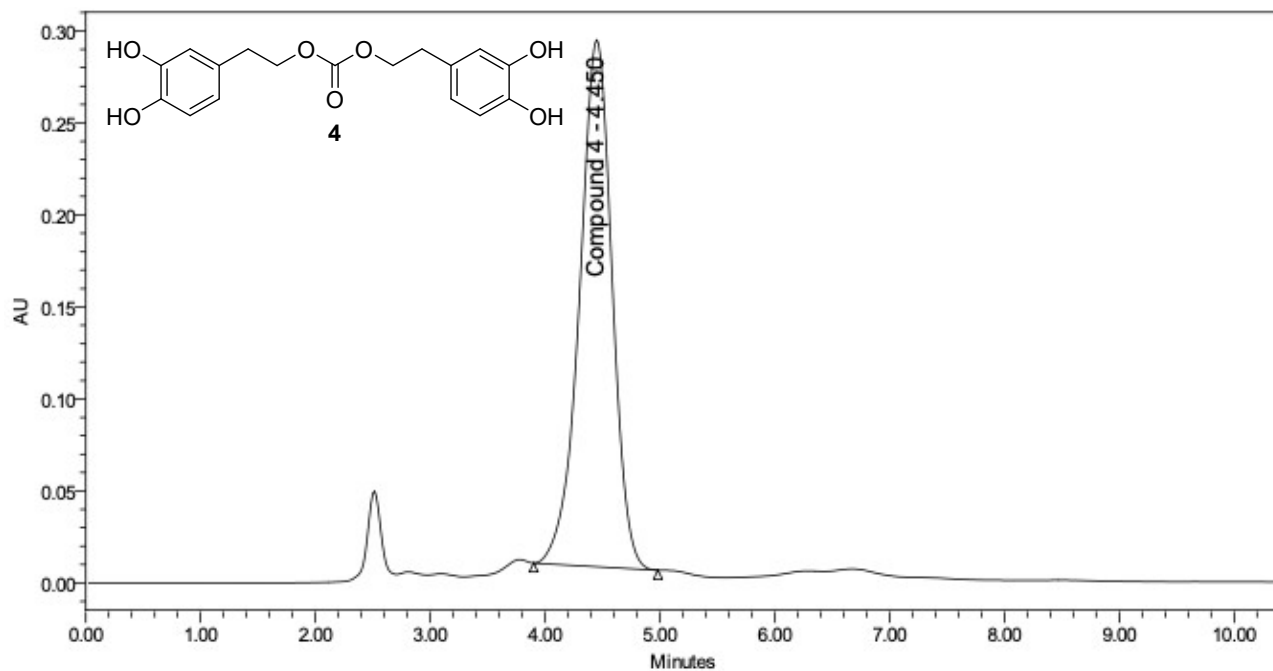

Supplement: d3ra04735k1.pdf [file d3ra04735k1.pdf]
